# Supplementary material for: Anodic SnO2 porous nanostructures with rich grain boundaries for efficient CO2 electroreduction to formate
Source: Royal Society of Chemistry journal article supplement (doi:10.1039/d0ra03152f), 2020-01-01
Supplement: d0ra03152f1.pdf [file d0ra03152f1.pdf]

Supporting information for

**Anodic SnO<sub>2</sub> Porous Nanostructures with Rich Grain Boundaries for  
Efficient CO<sub>2</sub> Electroreduction to Formate**

Ruizhen Ma,<sup>b</sup> Yan-Li Chen,<sup>a</sup> Yongli Shen,<sup>b</sup> Heng Wang,<sup>a</sup> Wei Zhang,<sup>a,\*</sup> Su-Seng Pang,<sup>c</sup> Jianfeng Huang,<sup>d,\*</sup> Yu Han,<sup>e</sup> Yunfeng Zhao,<sup>b,\*</sup>

<sup>a</sup> State Key Laboratory of Quality Research in Chinese Medicine, Macau Institute for Applied Research in Medicine and Health, Macau University of Science and Technology, Taipa, Macau, China.

<sup>b</sup> Tianjin Key Laboratory of Advanced Functional Porous Materials, Institute for New Energy Materials & Low-Carbon Technologies, School of Materials Science and Engineering, Tianjin University of Technology, 391 West Binshui Road, Xiqing District, Tianjin 300384, China

<sup>c</sup> Faculty of Information, Macau University of Science and Technology, Taipa, Macau, China.

<sup>d</sup> Multi-scale Porous Materials Center, Institute of Advanced Interdisciplinary Studies, School of Chemistry and Chemical Engineering, Chongqing University, Chongqing 400044, China

<sup>e</sup> Advanced Membranes and Porous Materials Center, King Abdullah University of Science and Technology, Thuwal 23955-6900, Kingdom of Saudi Arabia

Correspondence

E-mail: [wzhang@must.edu.mo](mailto:wzhang@must.edu.mo), [jianfeng.huang@cqu.edu.cn](mailto:jianfeng.huang@cqu.edu.cn), [yfzhao@tjut.edu.cn](mailto:yfzhao@tjut.edu.cn);

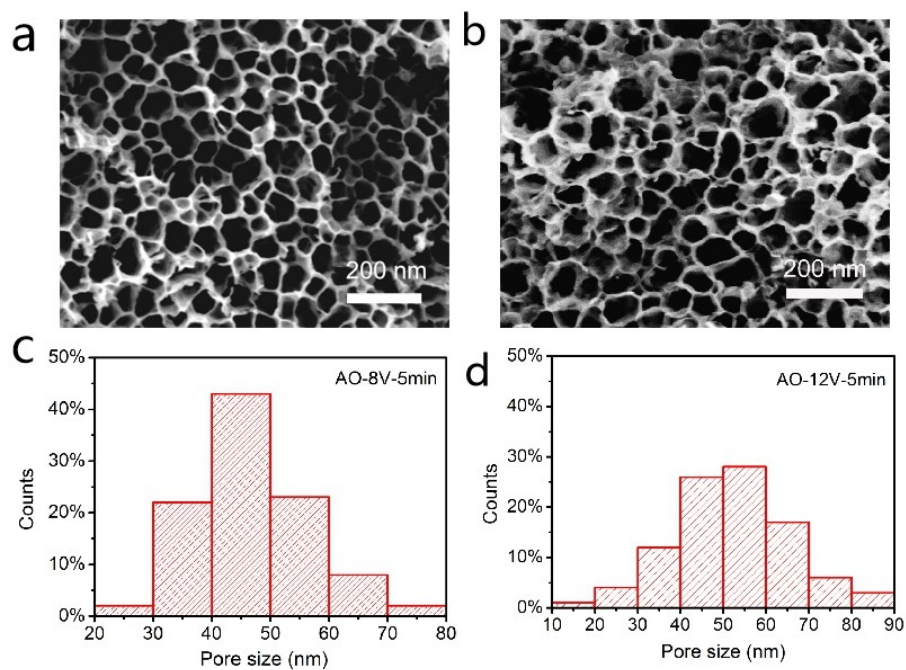

**Fig. S1** (a, b) SEM images taken from the surface of SnO<sub>2</sub>-AO<sub>8</sub> and SnO<sub>2</sub>-AO<sub>12</sub>, and (c, d) their corresponding pore size distribution graphs

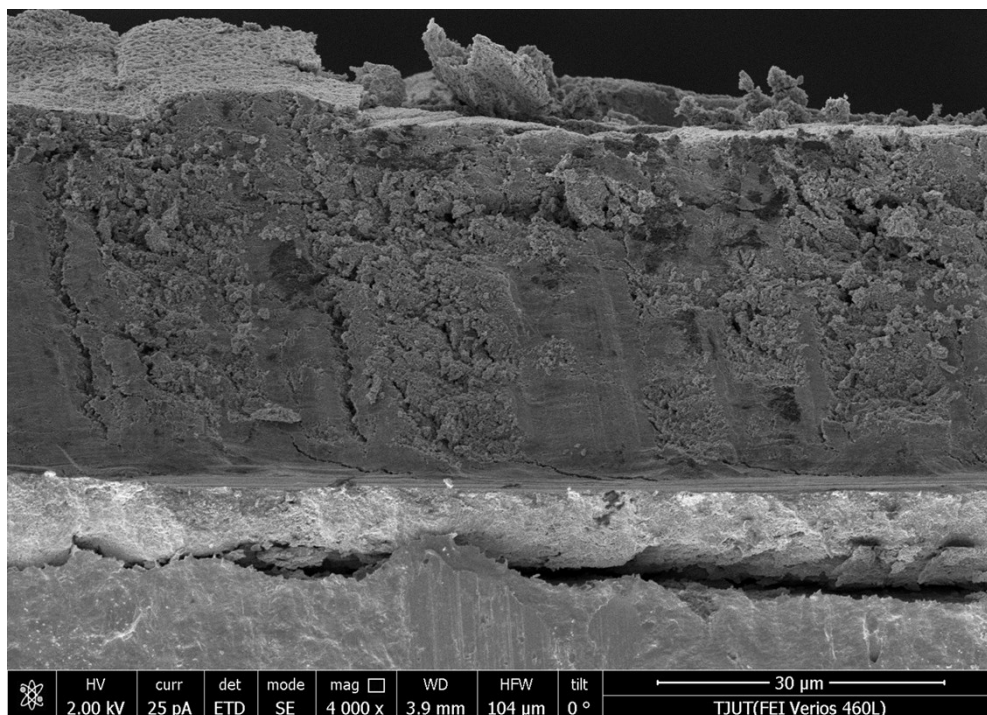

**Fig. S2** SEM image taken from the cross-section of SnO<sub>2</sub>-AO<sub>10</sub>.

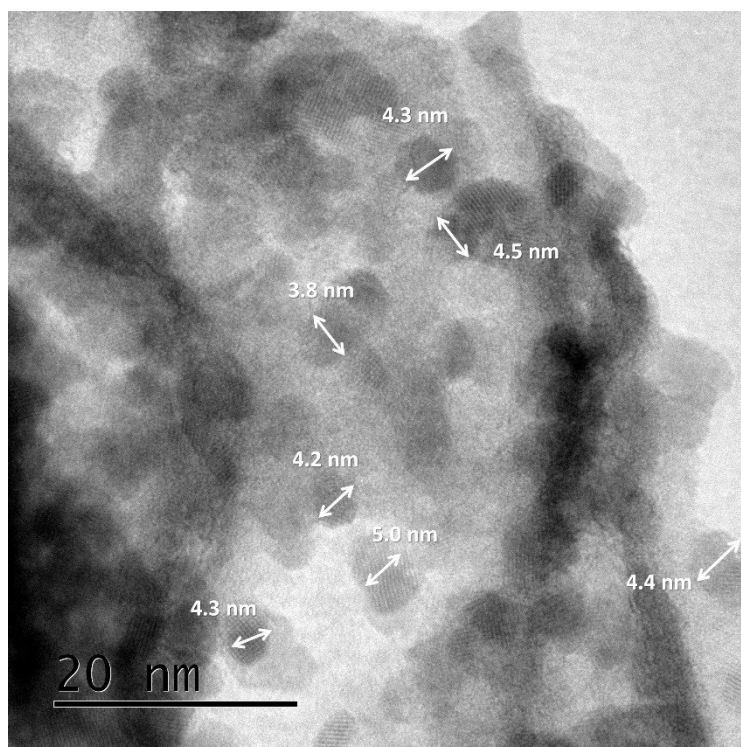

**Fig. S3** High-resolution TEM image of SnO<sub>2</sub>-AO<sub>10</sub> nanostructures.

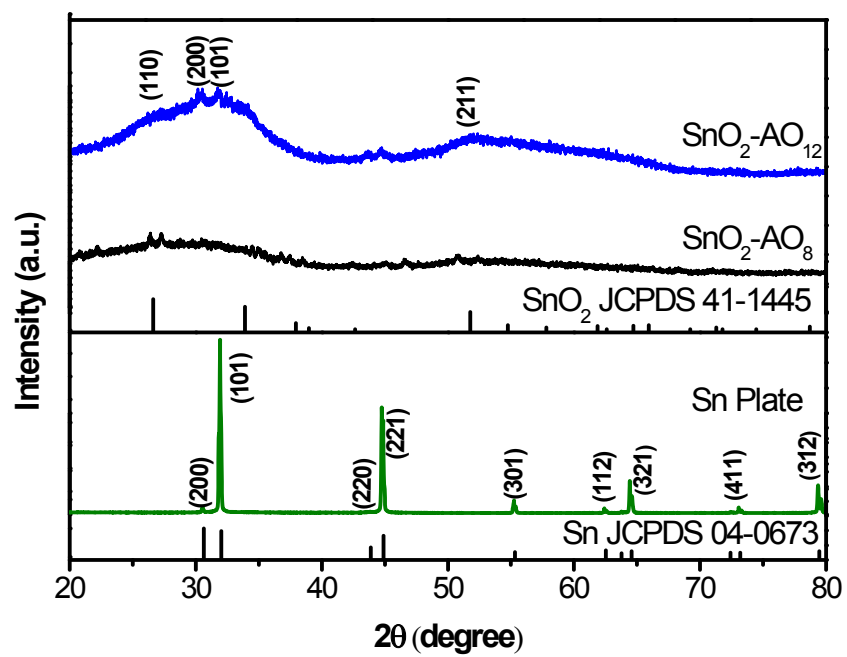

**Fig. S4** XRD patterns of Sn foil, SnO<sub>2</sub>-AO<sub>8</sub> and SnO<sub>2</sub>-AO<sub>12</sub> nanostructures.

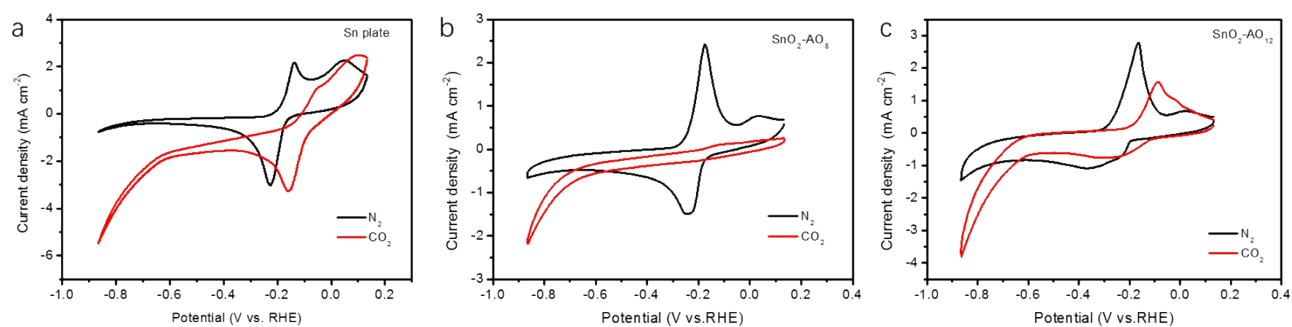

**Fig. S5** Polarization curves obtained on (a) Sn plate, (b)  $\text{SnO}_2\text{-AO}_8$ , and (c)  $\text{SnO}_2\text{-AO}_{12}$  in  $\text{N}_2$  and  $\text{CO}_2$  saturated 0.5 M  $\text{KHCO}_3$  solution with a scan rate of  $50 \text{ mV s}^{-1}$ .

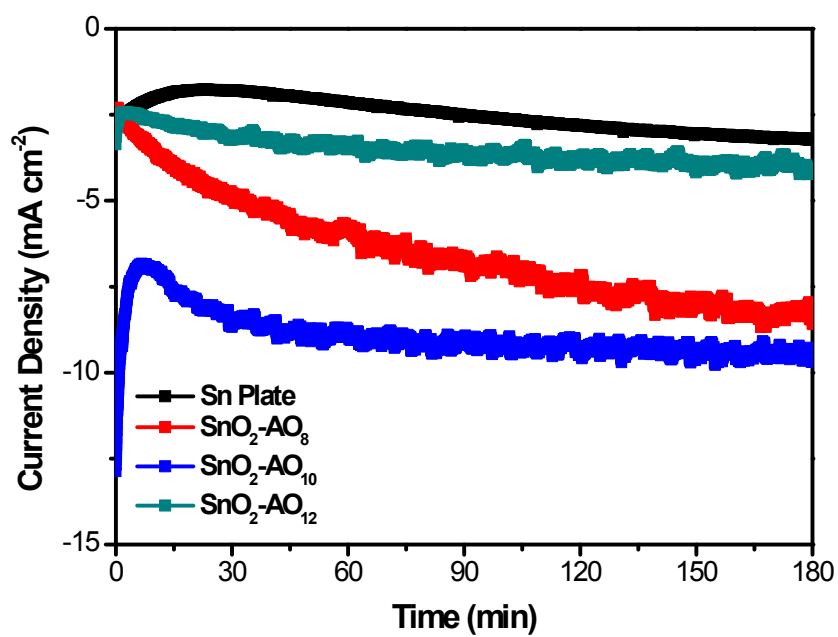

**Fig. S6** Current density curves of samples recorded at -0.8 V vs. RHE in 0.5 M KHCO<sub>3</sub> with the CO<sub>2</sub> flow rate of 2 mL min<sup>-1</sup>.

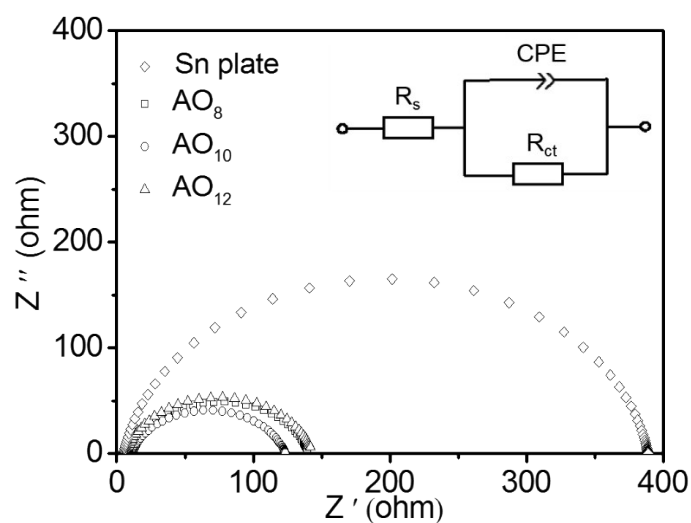

**Fig. S7** Electrochemical Impedance Spectroscopy (EIS) analysis SnO<sub>2</sub>-AO<sub>8</sub>, SnO<sub>2</sub>-AO<sub>10</sub> and SnO<sub>2</sub>-AO<sub>12</sub> electrode in CO<sub>2</sub> saturated 0.5 M KHCO<sub>3</sub> solution. The inset is an equivalent circuit diagram for fitting the Nyquist plot. Note: the diameter of the semicircle for SnO<sub>2</sub>-AO<sub>10</sub> is smaller than that of both SnO<sub>2</sub>-AO<sub>8</sub> and SnO<sub>2</sub>-AO<sub>12</sub>, signifying that SnO<sub>2</sub>-AO<sub>10</sub> exhibits the smallest charge-transfer resistance ( $R_{ct}$ ). It is well accepted that the crystallinity of an electroactive material governs its electrical conductivity, which in turn affects significantly its electrocatalytic performance. Consequently, the lower activity of the other two SnO<sub>2</sub> nanostructures (i.e., SnO<sub>2</sub>-AO<sub>8</sub> and SnO<sub>2</sub>-AO<sub>12</sub>) might be due to their poorer crystallinity (cf. **Fig.3d** & **Fig. S4**) which limits the electrical conductivity.



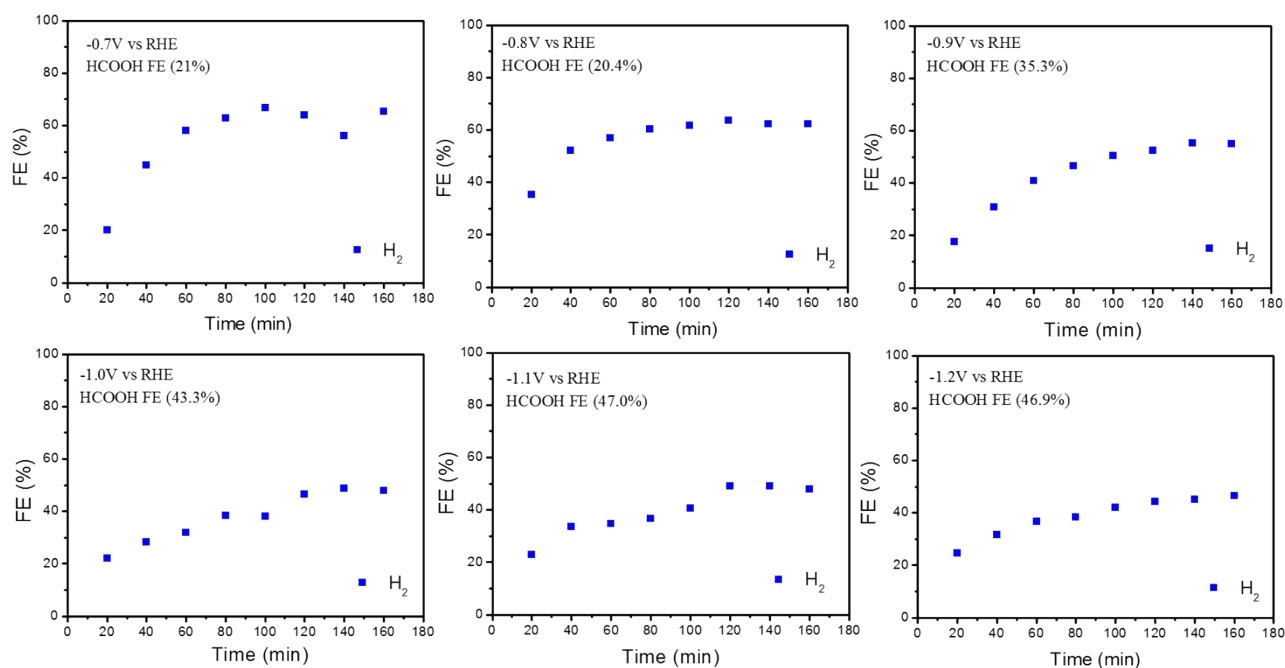

**Fig. S8**  $H_2$ , CO, and  $HCOOH$  FE as a function of electrolysis time on Sn plate electrode at the potential from -0.7 to -1.2 V vs. RHE.

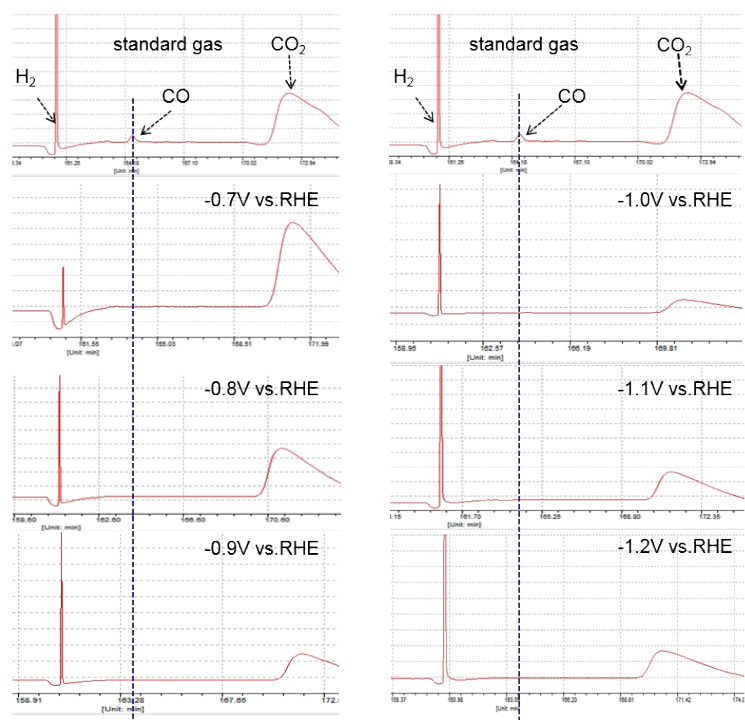

**Fig. S9** GC Spectra of products detected on Sn plate at different potentials.

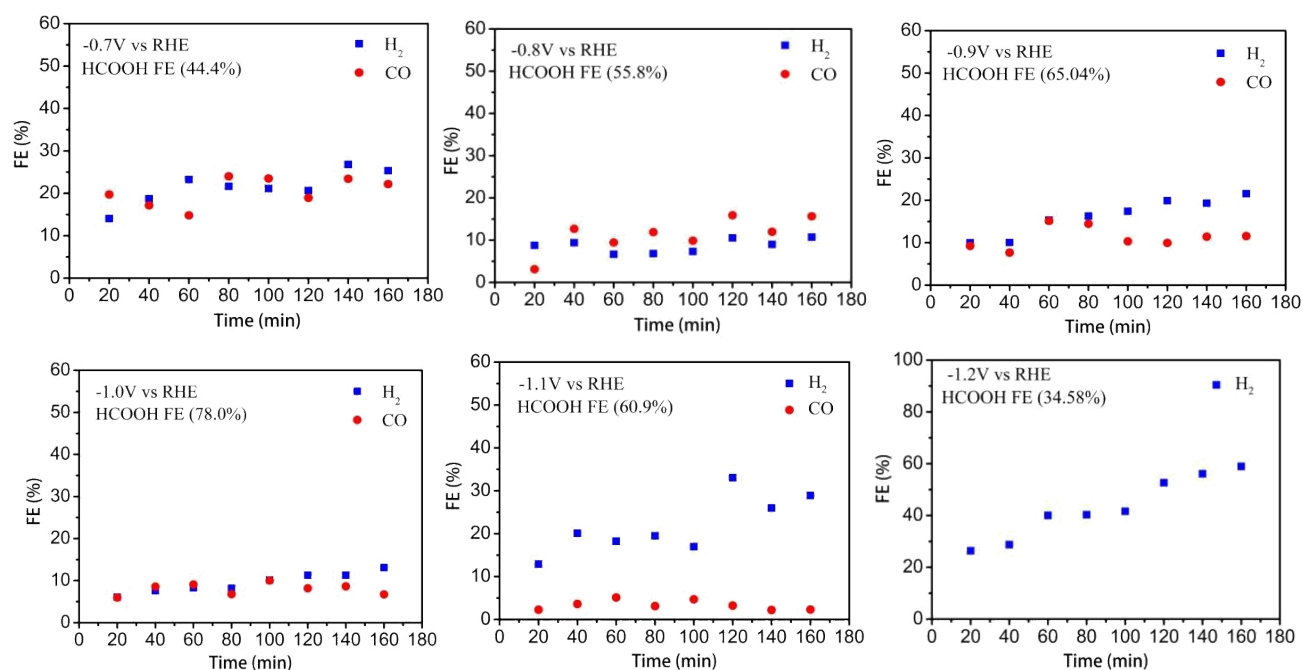

**Fig. S10**  $H_2$ ,  $CO$ , and  $HCOOH$  FE as a function of electrolysis time on  $SnO_2-AO_8$  electrode at the potential from -0.7 to -1.2 V vs. RHE.

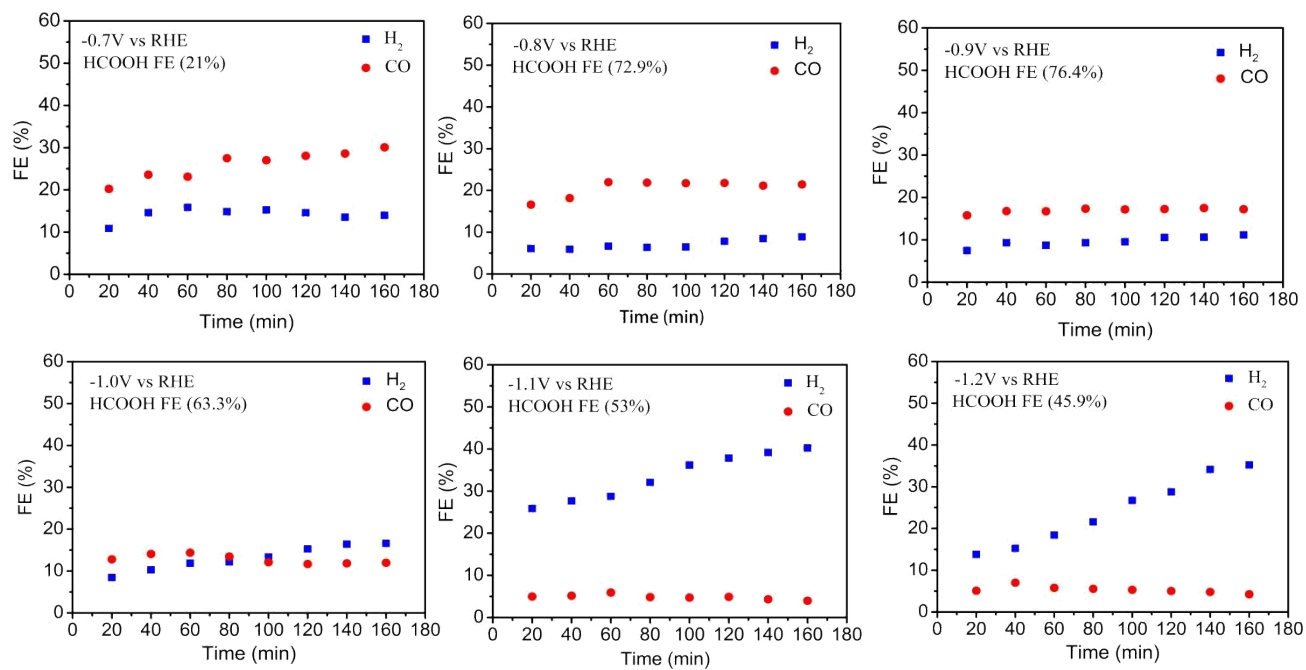

**Fig. S11**  $H_2$ ,  $CO$ , and  $HCOOH$  FE as a function of electrolysis time on  $SnO_2-AO_{10}$  electrode at the potential from -0.7 to -1.2 V vs. RHE.

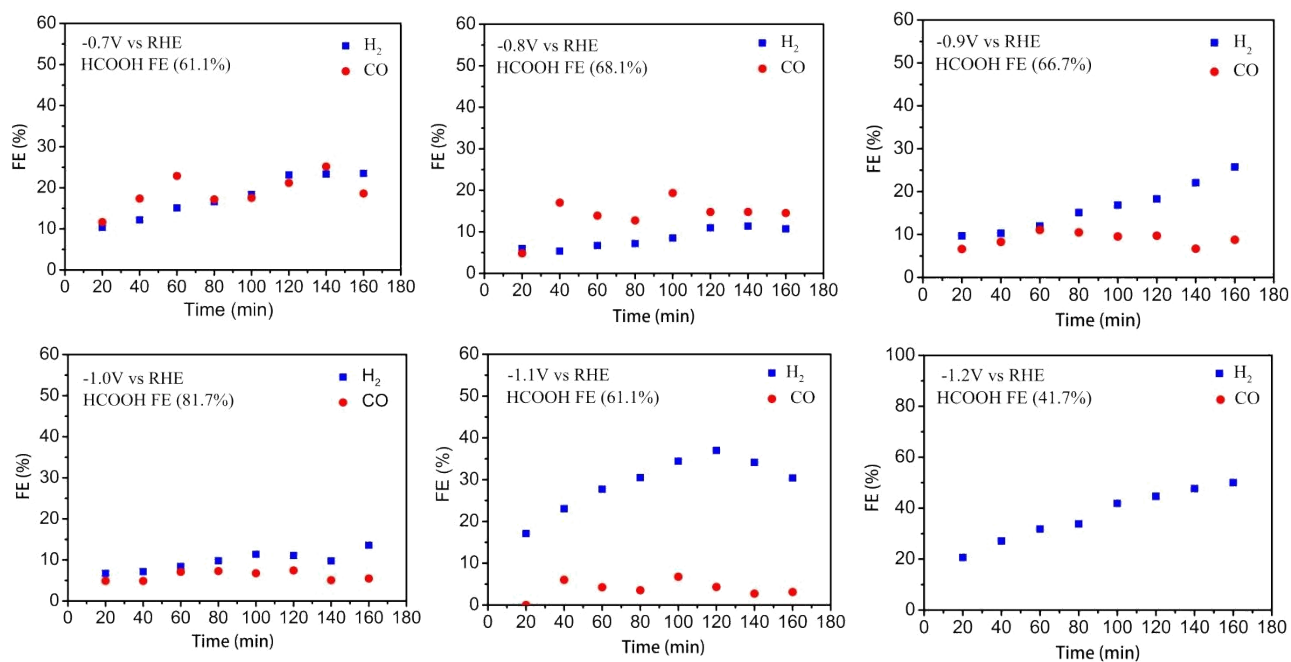

**Fig. S12** H<sub>2</sub>, CO, and HCOOH FE as a function of electrolysis time on SnO<sub>2</sub>-AO<sub>12</sub> electrode at the potential from -0.7 to -1.2 V vs. RHE.

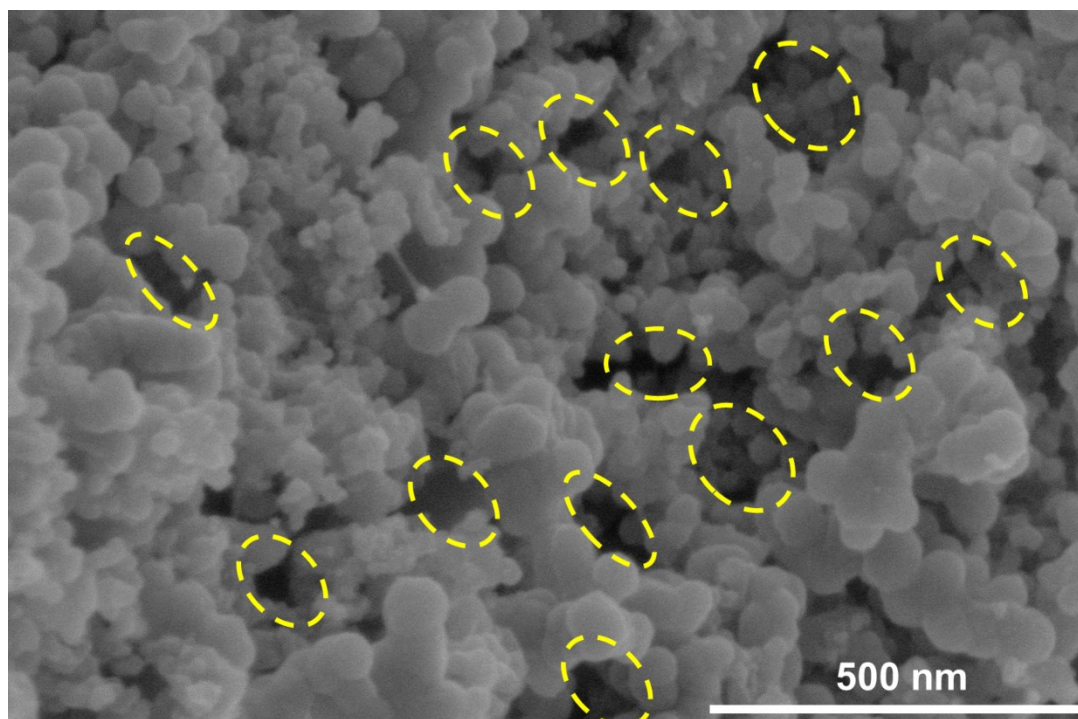

**Fig. S13** SEM image of SnO<sub>2</sub>-AO<sub>10</sub> after CO<sub>2</sub>RR at -0.8 V vs. RHE for 180 min. The yellow ellipses indicate the presence of macropores.

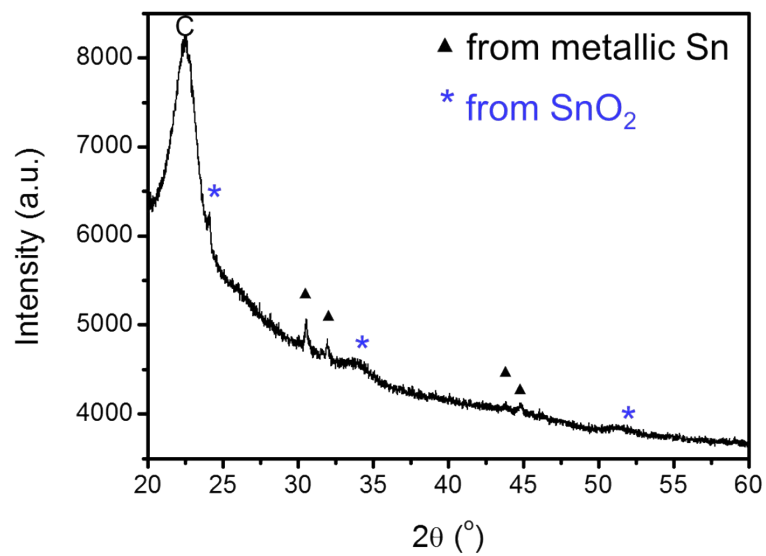

**Fig. S14** XRD patterns of SnO<sub>2</sub>-AO<sub>10</sub> after CO<sub>2</sub>RR under -0.8 V (vs RHE) for 180 min. Signals of both metallic Sn and SnO<sub>2</sub> were detected. The weak intensity is due to the scarcity of the sample that was collected after reaction. The strong peak at 22° arises from the carbon black.

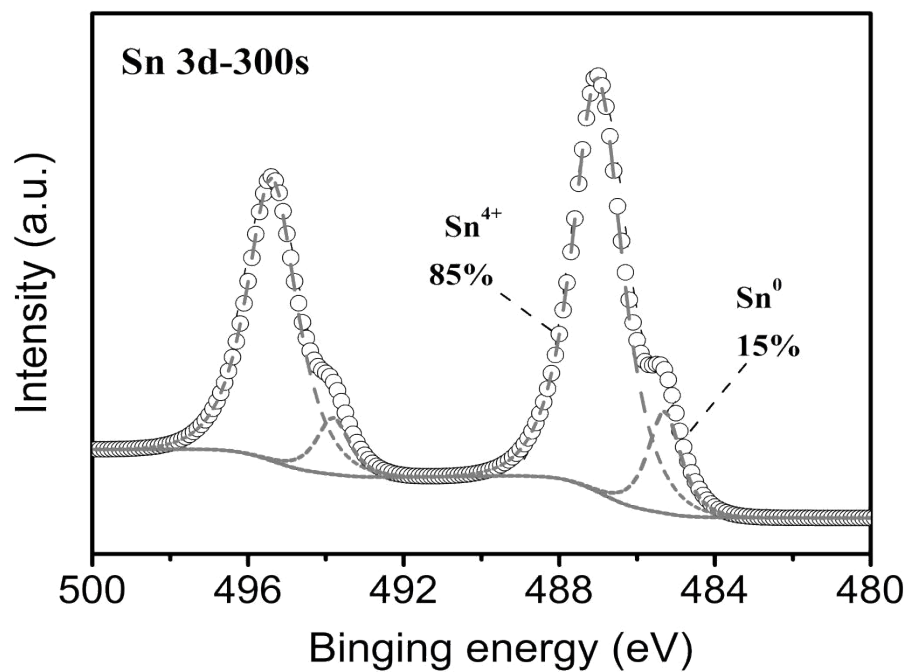

**Fig. S15** Depth XPS analysis (sputtering rate: 0.72 nm/s, sputtering time: 300 s) of SnO<sub>2</sub>-AO<sub>10</sub> after CO<sub>2</sub>RR at -0.8 V vs. RHE for 180 min.



**Table S1.** Comparison of working potentials and FEs for CO, HCOOH and C1 of Sn-based CO<sub>2</sub>RR from the literature and this work.

| Sn-based Catalysts                           | Electrolyte              | Potential <sup>a</sup><br>(V vs. RHE) | FE max (%) |             |          | Reference |
|----------------------------------------------|--------------------------|---------------------------------------|------------|-------------|----------|-----------|
|                                              |                          |                                       | CO         | HCOOH       | CO+HCOOH |           |
| SnO <sub>2</sub> @Carbon                     | 0.1M NaHCO <sub>3</sub>  | -1.19                                 | NA         | 96.3        | NA       | 1         |
| SnO <sub>2</sub> -50                         | 0.5M KHCO <sub>3</sub>   | -0.56V<br>vs.SHE                      | NA         | 56          | NA       | 2         |
| Graphene confined<br>Sn quantum sheets       | 0.1M NaHCO <sub>3</sub>  | -1.16                                 | NA         | 89          | NA       | 3         |
| Sn-pNW                                       | 0.1M KHCO <sub>3</sub>   | -0.8                                  | 14         | 78          | 92       | 4         |
| Core/Shell Cu/SnO <sub>2</sub><br>Structure  | 0.5M KHCO <sub>3</sub>   | -0.7                                  | 93         | NA          | NA       | 5         |
| Urchin-like SnO <sub>2</sub>                 | 0.5M KHCO <sub>3</sub>   | -1.4                                  | NA         | 62          | NA       | 6         |
| Mesoporous -SnO <sub>2</sub>                 | 0.1M KHCO <sub>3</sub>   | -0.8                                  | 38         | ~40         | ~80      | 7         |
| SnO/C                                        | 0.5M KHCO <sub>3</sub>   | -0.66                                 | 37         | NA          | NA       | 8         |
| Tin oxide NP                                 | 0.5 mol dm <sup>-3</sup> | -0.4                                  | NA         | 70          | NA       | 9         |
| porous Sn <sub>0.29</sub> In <sub>0.71</sub> | 0.1M NaHCO <sub>3</sub>  | -1.0                                  | ~13        | 59.2        | ~72      | 10        |
| Sn/SnO <sub>2</sub> porous<br>hollow fiber   | 0.1M KHCO <sub>3</sub>   | -0.95                                 | ~10        | 82.1        | 93       | 11        |
| SnO <sub>x</sub> /AgO <sub>x</sub>           | 0.1 M KHCO <sub>3</sub>  | -0.8                                  | ~60        | 21.1        | 95       | 12        |
| CuSn-NW Air                                  | 0.5M KHCO <sub>3</sub>   | -1.0                                  | NA         | 90.2        | NA       | 13        |
| CuSn-NW Air                                  | 0.5M KHCO <sub>3</sub>   | -0.9                                  | NA         | 81.2        | NA       | 13        |
| SnO <sub>2</sub> -AO <sub>8</sub>            | 0.5MKHCO <sub>3</sub>    | -0.8                                  | 15.7       | 55.8        | 71.5     | This work |
| SnO <sub>2</sub> -AO <sub>8</sub>            | 0.5MKHCO <sub>3</sub>    | -1.0                                  | 6          | 78          | 84       | This work |
| SnO <sub>2</sub> -AO <sub>10</sub>           | 0.5MKHCO <sub>3</sub>    | -0.8                                  | 22         | 72.9        | ~95      | This work |
| SnO <sub>2</sub> -AO <sub>10</sub>           | 0.5MKHCO <sub>3</sub>    | -0.9                                  | 15         | 76.4        | 91.4     | This work |
| SnO <sub>2</sub> -AO <sub>12</sub>           | 0.5MKHCO <sub>3</sub>    | -0.8                                  | 15.6       | 68.1        | 83.7     | This work |
| SnO <sub>2</sub> -AO <sub>12</sub>           | 0.5MKHCO <sub>3</sub>    | -1.0                                  | 5          | <b>81.7</b> | 87       | This work |

Note: The potentials were converted to RHE scale based on the equation,  $E(\text{RHE}) = E(\text{Ag}/\text{AgCl}) + 0.0591 \times \text{pH} + 0.210 \text{ V}$  or  $E(\text{RHE}) = E(\text{SCE}) + 0.0591 \times \text{pH} + 0.242 \text{ V}$  by assuming the pH of CO<sub>2</sub>-saturated 0.5 M and 0.1 M NaHCO<sub>3</sub> or KHCO<sub>3</sub> is 7.2 and 6.8, respectively. <sup>a</sup> the best value reported.

#### Reference in Table S1:

1. Zhang, S.; Kang, P.; Meyer, T.J. Nanostructured Tin Catalysts for Selective Electrochemical Reduction of Carbon Dioxide to Formate. *J. Am. Chem. Soc.* **2014**, 136, 1734-1737.
2. Fu, Y.; Li, Y.; Zhang, X.; Liu, Y.; Zhou, X.; Qiao, J. Electrochemical coreduction to formic acid on crystalline snonanosphere catalyst with high selectivity and stability. *Chinese. J. Catal.* **2016**,

37, 1081-1088.

3. Lei, F.; Liu, W.; Sun, Y.; Xu, J.; Liu, K.; Liang, L. Metallic tin quantum sheets confined in graphene toward high-efficiency carbon dioxide electroreduction. *Nat. Commun.* **2016**, *7*, 12697.
4. Kumar, B.; Atla, V.; Brian, J. P.; Kumari, S.; Nguyen, T. Q. Reduced SnO<sub>2</sub> porous nanowires with a high density of grain boundaries as catalysts for efficient electrochemical CO<sub>2</sub>-into-HCOOH conversion. *Angew. Chem. Int. Ed.* **2017**, *56*, 3645-3649.
5. Li, Q.; Fu, J.; Zhu, W.; Chen, Z. Tuning Sn-Catalysis for Electrochemical Reduction of CO<sub>2</sub> to CO via the Core/Shell Cu/SnO<sub>2</sub> Structure. *J. Am. Chem. Soc.* **2017**, *139*, 4290-4293.
6. Liu, Y.; Fan, M.; Zhang, X.; Zhang, Q.; Guay, D.; Qiao, J. Design and engineering of urchin-like nanostructured SnO<sub>2</sub> catalysts via controlled facial hydrothermal synthesis for efficient electroreduction of CO<sub>2</sub>. *Electrochim. Acta.* **2017**, *248*, 123-132.
7. Ge, H.; Gu, Z.; Han, P.; Shen, H. Mesoporous tin oxide for electrocatalytic CO<sub>2</sub> reduction. *J. Colloid. Interf. Sci.* **2018**, *531*, 564-569.
8. Gu, J.; Héroguel, F.; Luterbacher, J.; Hu, X. Densely packed, ultra-small SnO nanoparticles for enhanced activity and selectivity in electrochemical CO<sub>2</sub> reduction. *Angew. Chem. Int. Ed.* **2018**, *57*, 2943-2947.
9. Dutta, A.; Kuzume, A.; Kaliginedi, V. Probing the chemical state of tin oxide NP catalysts during CO<sub>2</sub> electroreduction: A complementary operando approach. *Nano Energy* **2018**, *53*, 828-840.
10. Hyenki, K.; Hyunju, L.; Taeho, L. Facile fabrication of porous Sn-based catalysts for electrochemical CO<sub>2</sub> reduction to HCOOH and syngas. *J. Ind. Eng. Chem.* **2018**, *66*, 248-253.
11. Hu, H.; Gui, L.; Zhou, W.; Sun, J. Partially reduced Sn/SnO<sub>2</sub> porous hollow fiber: A highly selective, efficient and robust electrocatalyst towards carbon dioxide reduction. *Electrochim. Acta.* **2018**, *285*, 70-77.
12. Choi, Y.W.; Scholten, F.; Sinev I.; Cuenya, B.R. Enhanced Stability and CO/Formate Selectivity of Plasma-Treated SnO<sub>x</sub>/AgO<sub>x</sub> Catalysts during CO<sub>2</sub> Electroreduction. *J. Am. Chem. Soc.* **2019**, *141*, 5261-5266.
13. Wang, J.; Ji, Y.; Shao, Q.; Yin, R.; Guo, J.; Li, Y.; Huang, X. Phase and structure modulating of bimetallic CuSn nanowires boosts electrocatalytic conversion of CO<sub>2</sub>. *Nano Energy* **2019**, *59*, 138-145.
